1 **Title: Comparison of multiple whole-genome and *Spike*-only sequencing protocols for estimating**  
2 **variant frequencies via wastewater-based epidemiology**

3

4 **Authors**

5 Lucy A. Winder<sup>1</sup>, Paul Parsons<sup>1</sup>, Gavin Horsburgh<sup>1</sup>, Kathryn Maher<sup>1</sup>, Helen Hipperson<sup>1</sup>, Claudia  
6 Wierzbicki<sup>2</sup>, Aaron R. Jeffries<sup>3</sup>, Mathew R. Brown<sup>4,†</sup>, Aine Fairbrother-Browne<sup>4,\*</sup>, Hubert Denise<sup>4</sup>,  
7 Mohammad S. Khalifa<sup>4,☒</sup>, Irene Bassano<sup>4</sup>, Ronny van Aerle<sup>4</sup>, Rachel Williams<sup>5</sup>, Kata Farcas<sup>5</sup>, Steve  
8 Paterson<sup>2</sup>, Paul G. Blackwell<sup>6</sup>, Terry Burke<sup>1</sup>

9

10 <sup>1</sup>NERC Environmental Omics Facility, Ecology and Evolutionary Biology, School of Biosciences,  
11 University of Sheffield, Sheffield, S10 2TN, UK.

12 <sup>2</sup>NERC Environmental Omics Facility, Department of Evolution, Ecology and Behaviour, Institute of  
13 Infection, Veterinary and Ecological Sciences, University of Liverpool, Liverpool, L69 7ZB, UK.

14 <sup>3</sup>Biosciences, Faculty of Health and Life Sciences, University of Exeter, Geoffrey Pope Building,  
15 Exeter, EX4 4QD, UK.

16 <sup>4</sup>Environmental Monitoring for Health Protection, UK Health Security Agency, Nobel House, 20  
17 London SW1P 3HX, UK.

18 <sup>5</sup>Centre for Environmental Biotechnology, School of Natural Sciences, Bangor University, Bangor,  
19 Gwynedd, LL57 2UW, UK

20 <sup>6</sup>School of Mathematics and Statistics, University of Sheffield, Sheffield, S10 2TN, UK.

21

22 <sup>†</sup>Current address: Environmental Engineering, School of Engineering, Cassie Building, Newcastle  
23 University, Newcastle upon Tyne NE1 7RU.

24 <sup>\*</sup>Current address: 1. Institute of Neurology, University College London (UCL), London, UK, 2.  
25 Genetics and Genomic Medicine, Great Ormond Street Institute of Child Health, University College  
26 London, London, WC1E 6BT, UK, 3. Department of Medical and Molecular Genetics, School of Basic  
27 and Medical Biosciences, King's College London, London, UK.

28 <sup>☒</sup>Current address: Division of Biosciences, College of Health, Medicine and Life Sciences, Brunel  
29 University, London, UB8 3PH,UK.

## 30 **Abstract**

31 Sequencing of SARS-CoV-2 in wastewater provides a key opportunity to monitor the prevalence of  
32 variants spatiotemporally, potentially facilitating their detection simultaneously with, or even prior  
33 to, observation through clinical testing. However, there are multiple sequencing methodologies  
34 available. This study aimed to evaluate the performance of alternative protocols for detecting SARS-  
35 CoV-2 variants. We tested the detection of two synthetic RNA SARS-CoV-2 genomes in a wide range  
36 of ratios and at two concentrations representative of those found in wastewater using whole-  
37 genome and *Spike*-gene-only protocols utilising Illumina and Oxford Nanopore platforms. We  
38 developed a Bayesian hierarchical model to determine the predicted frequencies of variants and the  
39 error surrounding our predictions. We found that most of the sequencing protocols detected  
40 polymorphic nucleotide frequencies at a level that would allow accurate determination of the  
41 variants present at higher concentrations. Most methodologies, including the *Spike*-only approach,  
42 could also predict variant frequencies with a degree of accuracy in low-concentration samples but,  
43 as expected, with higher error around the estimates. All methods were additionally confirmed to  
44 detect the same prevalent variants in a set of wastewater samples. Our results provide the first  
45 quantitative statistical comparison of a range of alternative methods that can be used successfully in  
46 the surveillance of SARS-CoV-2 variant frequencies from wastewater.

47

## 48 **Key words**

49 Next-generation sequencing, Covid-19, RNA sequencing, variant detection, frequency estimation

50

## 51 **Impact**

52 Genetic sequencing of SARS-CoV-2 in wastewater provides an ideal system for monitoring variant  
53 frequencies in the general population. The advantages over clinical data are that it is more cost  
54 efficient and has the potential to identify new variants before clinical testing. However, to date,  
55 there has been no direct comparison to determine which sequencing methodologies perform best at  
56 identifying the presence and prevalence of variants. Our study compares seven sequencing methods  
57 to determine which performs best. We also develop a Bayesian statistical methodology to estimate  
58 the confidence around variant frequency estimates. Our results will help monitor SARS-CoV-2  
59 variants in wastewater, and the methodology could be adapted for other disease monitoring,  
60 including future pandemics.

## 61 **Introduction**

62 The regular testing of wastewater for the presence of SARS-CoV-2 using quantitative PCR (qPCR) has  
63 been widely adopted in response to the Covid-19 pandemic since 2020 in the UK, including at major  
64 sewage treatment works (Farkas et al., 2020; Larsen and Wigginton, 2020). This monitoring tool has  
65 proven to be a valuable adjunct to other data sources on the progress, prevalence and location of  
66 Covid-19 in the human population within the catchment of each sampling site. Wastewater  
67 monitoring, therefore, provides both temporal and spatial information on the development of the  
68 Covid-19 pandemic. Furthermore, this methodology is unbiased by asymptomatic infections (Sah et  
69 al. 2021) and could potentially allow for the detection of variants before clinical cases have  
70 presented (Peccia et al 2020). Early detection of new variants in the UK has numerous public health  
71 benefits, giving policymakers and healthcare professionals more time to prepare for new Covid-19  
72 infection waves.

73 The power of qPCR is accurately determining the presence, absence and concentration of SARS-CoV-  
74 2, and, on occasion, via protocol modification, alternative focal variants (Alcoba-Florez et al 2020;  
75 Kudo et al 2020). However, qPCR assays that only target one genomic region can be susceptible to  
76 false negatives when the sample is either high in inhibitors, degraded and/or of a concentration  
77 outside the assays limit of detection (Forootan et al. 2017; Schrader et al. 2012; Bahreini et al. 2020).  
78 Variants can also lead to false negatives in qPCR assays, if a mutation has emerged at the primer  
79 binding site (Lefever et al. 2013). This issue was highlighted with the emergence of the B.1.1.7  
80 variant; the deletion H69-V70 falls in the target region of a primer set run routinely, leading to the  
81 complete dropout of the S marker from tests (Bal et al. 2021; Volz et al. 2021). The most powerful  
82 method to detect variants is potentially through RNA sequencing.

83 Next-generation sequencing (NGS) technologies, especially those with short read lengths, have  
84 worked effectively even on degraded samples (Sanz and Köchling 2019; Burrell et al. 2015). This is  
85 because the short read length increases the chance of successfully generating amplicons in  
86 fragmented samples (Burrell et al. 2015; Berglund et al. 2011) and the large number of reads means  
87 that even rare sequences within a sample can be identified (Ryu et al. 2018). The RNA of SARS-CoV-2  
88 can be detected in the faeces of infected human hosts (Chen et al. 2020) and can persist in aquatic  
89 environments for several days (Bivins et al. 2020; Sala-Comorera et al. 2021). Furthermore, SARS-  
90 CoV-2 sequencing data from wastewater samples can be used to determine variants and their  
91 frequency, with evidence suggesting this is more sensitive than clinical surveillance (Karthikeyan et  
92 al. 2022; Morvan et al. 2022). However, there has been, to date, no formal comparison of alternative  
93 NGS protocols in detecting SARS-CoV-2 in wastewater. Determining the methods which are better

94 able to determine variant frequencies, particularly at low concentrations, could be invaluable to  
95 efforts monitoring SARS-CoV-2 in wastewater.

96 This study aimed to compare alternative sequencing protocols to identify the most efficient for  
97 sequencing mixtures of SARS-CoV-2 variants and estimate the frequencies of those present. The  
98 protocols were tested initially by creating mixtures of synthetic RNA for two variants that reached  
99 high frequencies in the course of the pandemic in the UK. Two concentrations of synthetic RNA were  
100 designed to be comparable to those seen in wastewater. The study included the development of a  
101 Bayesian statistical approach to attach credible intervals to variant frequency estimates. The analysis  
102 also included a comparison between qPCR analysis of specific variants and PCR-based SNP detection  
103 of variants. Finally, the methods were compared through the sequencing of RNA obtained from  
104 wastewater collected from a population experiencing a high level of Covid-19 infection.

105

## 106 **Methods**

### 107 ***Mixtures of synthetic SARS-CoV-2 RNA***

108 We obtained two synthetic SARS-CoV-2 RNA genomes from Twist Bioscience (South San Francisco,  
109 CA): Control C12 (B.1.369; GenBank EPI\_ISL\_420244; GISAID England/SHEF-C05B2/2020; denoted  
110 “SHEF”) and Control 15 alpha (B.1.1.7; EPI\_ISL\_601443; England/MILK-9E05B3/2020; denoted  
111 “MILK”). These were each supplied as six contiguous *ca* 5-kb fragments at an approximate  
112 concentration of  $10^6$  genome copies (gc) per microlitre. Any amplicons designed across a breakpoint  
113 between adjacent RNA sequences could not be amplified. We prepared a range of mixtures at  
114 nominal concentrations of 200 gc/ $\mu$ L and 20 gc/ $\mu$ L in a range of ratios from 100% SHEF to 100% MILK  
115 (Table 1). These two concentrations were chosen to be comparable to the amounts of SARS-CoV-2  
116 RNA obtained from 250-mL wastewater samples in the UK national monitoring programme  
117 (corresponding to concentrations of  $10^2$ – $10^5$  gc/l, UKHSA 2021). We note that the number of  
118 genome copies of a minor variant is expected to be limiting when present at a low proportion in a  
119 sample of low overall concentration; for example, a variant at 1% frequency in the lower  
120 concentration used here is only expected to be present, on average, as a single copy in a 5- $\mu$ L PCR  
121 reaction (as used by several of the methods tested here).

122 The SNP frequencies obtained from the sequencing data indicated that the two concentrated RNAs  
123 differed in initial concentration. We therefore used the numbers of sequencing reads obtained for  
124 diagnostic SNPs in the *Spike* gene for the nominal 50:50 variant mixes to correct the ratios (using  
125 data for two replicate sequencing runs obtained using each of the Oxford Nanopore and Illumina

126 sequencing SubARTIC methods, described below, and assuming that the mean starting  
127 concentration of the two variants was  $10^6$  gc/ul), and from these data we calculated corrected  
128 estimated ratios in the utilised mixtures (Table 1).

129

130

131 **Table 1** *Estimated concentrations of synthetic RNA variants in mixtures, corrected using sequencing*  
132 *data (see text).*

133

| Mixture no. | Nominal proportions |       | Corrected proportions |       | High concentration/<br>Estimated genome copies per $\mu$ l |       | Low concentration/<br>Estimated genome copies per $\mu$ l |      |
|-------------|---------------------|-------|-----------------------|-------|------------------------------------------------------------|-------|-----------------------------------------------------------|------|
|             | SHEF                | MILK  | SHEF                  | MILK  | SHEF                                                       | MILK  | SHEF                                                      | MILK |
| 1           | 0.000               | 1.000 | 0.000                 | 1.000 | 0.0                                                        | 158.4 | 0.0                                                       | 15.8 |
| 2           | 0.010               | 0.990 | 0.015                 | 0.985 | 2.4                                                        | 156.8 | 0.2                                                       | 15.7 |
| 3           | 0.050               | 0.950 | 0.074                 | 0.926 | 12.1                                                       | 150.5 | 1.2                                                       | 15.0 |
| 4           | 0.100               | 0.900 | 0.145                 | 0.855 | 24.2                                                       | 142.6 | 2.4                                                       | 14.3 |
| 5           | 0.200               | 0.800 | 0.276                 | 0.724 | 48.3                                                       | 126.7 | 4.8                                                       | 12.7 |
| 6           | 0.500               | 0.500 | 0.604                 | 0.396 | 120.8                                                      | 79.2  | 12.1                                                      | 7.9  |
| 7           | 0.800               | 0.200 | 0.859                 | 0.141 | 193.3                                                      | 31.7  | 19.3                                                      | 3.2  |
| 8           | 0.900               | 0.100 | 0.932                 | 0.068 | 217.4                                                      | 15.8  | 21.7                                                      | 1.6  |
| 9           | 0.950               | 0.050 | 0.967                 | 0.033 | 229.5                                                      | 7.9   | 23.0                                                      | 0.8  |
| 10          | 0.990               | 0.010 | 0.993                 | 0.007 | 239.2                                                      | 1.6   | 23.9                                                      | 0.2  |
| 11          | 1.000               | 0.000 | 1.000                 | 0.000 | 241.6                                                      | 0.0   | 24.2                                                      | 0.0  |
| 12          | 0.000               | 0.000 | 0.000                 | 0.000 | 0                                                          | 0     | 0                                                         | 0    |

134

135

136

137 ***Wastewater Sample Collection, Concentration and Extraction***

138 Wastewater grab samples (1 L per sample) were collected from 17 locations across the London  
139 sewer network on five consecutive days from the 10–14 January 2021 as part of the ongoing  
140 Environmental Monitoring for Health Protection (EMHP) programme in England. Samples were  
141 transported to Eurofins BioPharma, Glastrup, Denmark and stored at 4–6°C until RNA extraction,  
142 minimising RNA degradation. Two hundred-millilitre subsamples from each location were pooled on  
143 each day (totalling 3.4 L), mixed, then split into 20 X 100-mL subsamples and then purified via  
144 centrifugation (10,000 Xg for 30 minutes at 4°C). Fifty millilitres of each supernatant was retained,  
145 with the pH adjusted (to 7.0–7.6 using 1 M NaOH) prior to concentration into 2 mL using  
146 polyethylene glycol precipitation (PEG, 40% PEG 8000, 8% NaCl) overnight at 4°C followed by  
147 further centrifugation (10,000 Xg for 30 minutes at 4°C). RNA was then extracted using the VIRSeek  
148 RNAExtractor kit (Eurofins Technologies, Germany) and the KingFisher Flex Purification System  
149 (Thermo, UK) according to the manufacturers' instructions, so generating 20 100-µL RNA extracts  
150 per date. For each date, the RNA extracts were pooled, mixed and re-aliquoted into 20 X 100-µL  
151 extracts, which were stored at -20°C until distribution to the participating laboratories for  
152 sequencing.

153 **Table 2:** Sequencing / genotyping methods assessed for their capacity to estimate variant frequencies.

154

| Method       | Sequencing platform     | Laboratory | Target            | No. of amplicons | Amplicon size range (bp) | Mean insert length excluding primers (size range, bp) | Reference               |
|--------------|-------------------------|------------|-------------------|------------------|--------------------------|-------------------------------------------------------|-------------------------|
| ARTIC        | Illumina MiSeq          | Liverpool  | Whole genome      | 98               | ca 400                   | 343 (316–375)                                         | Quick (2020)            |
| NEB FS ARTIC | Illumina MiSeq          | Liverpool  | Whole genome      | 98               | ca 400                   | ca 340                                                | ?                       |
| Nimagen      | Illumina NovaSeq        | Exeter     | Whole genome      | 154              | 149–300                  | 227 (96–250)                                          | Jeffries (2021)         |
| Swift        | Illumina MiSeq          | Liverpool  | Whole genome      | 345              | 116–319                  | 102.8 (76–276)                                        | Addetia et al. (2020)   |
| SubARTIC     | Illumina MiniSeq        | Sheffield  | <i>Spike</i> gene | 38               | 138–208                  | 119.8 (90–160)                                        | Horsburgh et al. (2021) |
| SubARTIC     | Oxford Nanopore GridION | Sheffield  | <i>Spike</i> gene | 38               | 138–208                  | 119.8 (90–160)                                        | Parsons et al. (2021)   |

155 ***cDNA Synthesis and Sequencing***

156 (1) ARTIC Illumina

157 The ARTIC protocol has been widely implemented for sequencing clinical samples of SARS-CoV-2 on  
158 the Oxford Nanopore platform (Quick 2020; examples of use: Rivett et al 2020; Tegally et al 2021).  
159 This protocol uses a primer set (version 3 here; Quick 2020) that produces amplicons across the  
160 whole genome (Table 2), and was adapted in Liverpool so that the amplicons could be sequenced on  
161 the Illumina MiSeq platform. The primers are tiled, with even and odd amplicons amplified  
162 separately before pooling for sequencing library preparation. Here, we used the protocol to  
163 sequence mixtures of synthetic SARS-CoV-2 RNA and RNA recovered from wastewater on the  
164 Illumina MiSeq instrument.

165 RNA extracted from wastewater was DNase-treated to remove residual DNA to prevent PCR  
166 inhibition; 40 µl RNA was treated using the TURBO DNA-free Kit (Ambion). Following DNase  
167 treatment, the RNA was purified and concentrated with a 1.8x RNA bead clean up and eluted in 16 µl  
168 nuclease-free water. Twist synthetic RNA standards were used directly. Reverse transcription was  
169 performed in duplicate using 2 µl NEB Lunascript and 8 µl RNA, including negative and positive  
170 controls, with the cycling conditions as follows: 25°C for 2 minutes, 55°C for 10 minutes, 95°C for 1  
171 minute. Tiling PCR using the ARTIC v3 primer sets was performed using 4 µl cDNA input per PCR. The  
172 cycling conditions were initial denaturation at 98°C for 30 seconds, followed by 30 cycles of  
173 denaturation at 98°C for 15 seconds, and annealing and extension at 63°C for 5 minutes, with a final  
174 hold at 4°C. Following PCR, amplicon pools A and B for each sample were pooled and a 1:1 Ampure  
175 XP bead (Beckman) purification was performed, and eluted in 20 µl nuclease-free water. Ten  
176 microlitres of purified library was used for library preparation.

177 The library was prepared for sequencing using a one-third volume NEB Next Ultra II protocol and  
178 indexed using unique dual indexes (IDT), using the following cycling conditions: initial denaturation  
179 at 98°C followed by 5 cycles of denaturation at 98°C for 30 seconds, and annealing and extension at  
180 65°C for 75 seconds, a final extension at 65°C for 5 minutes and a final hold at 4°C. The indexed  
181 library was pooled without normalisation, taking 2 µl of each sample, and purified using a 0.8x  
182 Ampure purification. The final library was quantified and run on the Agilent Bioanalyzer. The library  
183 concentration was determined using qPCR prior to sequencing using the Illumina Miseq v2 250 x 250  
184 cycle kit.

185 (2) NEB FS ARTIC Illumina



186 RNA extracted from wastewater was DNase-treated to remove residual DNA in order to prevent PCR  
187 inhibition; 40 µlRNA was treated with the TURBO DNA-free Kit (Ambion). Following DNase  
188 treatment, the RNA was purified and concentrated with a 1.8x RNA bead clean up and eluted in 16  
189 µlnuclease-free water. Twist synthetic RNA standards were used directly. Reverse transcription was  
190 performed in duplicate using 2 µlNEB Lunascript and 8 µlRNA, including negative and positive  
191 controls, with the cycling conditions as follows: 25°C for 2 minutes, 55°C for 10 minutes, 95°C for 1  
192 minute. Tiling PCR using the ARTIC v3 primer pools was performed using 4 µlcDNA input per reaction  
193 with the following cycling conditions: initial denaturation at 98°C for 30 seconds, followed by 30  
194 cycles of denaturation at 98°C for 15 seconds and annealing and extension at 63°C for 5 minutes,  
195 with a final hold at 4°C. Following PCR, amplicon pools A and B for each sample were pooled and a  
196 1:1 Beckman Ampure XP bead purification was performed, and eluted in 20 µlnuclease-free water.

197 Ten microlitres of pooled purified PCR product was fragmented using the NEBNext Ultra II FS DNA  
198 Library Prep Kit, following the protocol for inputs ≤100 ng. The library was fragmented for 30  
199 minutes at 37°C to fragment amplicons to ~120 bp. Adapter ligated libraries were purified using a  
200 0.9x Ampure bead clean up, and eluted in 8 µlnuclease-free water and indexed using unique dual  
201 indexes (IDT) with the following cycling conditions: 98°C for 30 seconds, followed by 5 cycles of  
202 denaturation at 98°C for 30 seconds and annealing and extension at 65°C for 75 seconds, with a final  
203 extension at 65°C for 5 minutes. The indexed library was pooled without normalisation, taking 2 µlof  
204 each sample and purified using a 1:1 Ampure purification followed by a 0.8x purification to remove  
205 remaining short fragments. Libraries were run on the Agilent Bioanalyzer and quantified using qPCR  
206 prior to sequencing. Sequencing was performed using Illumina Miseq v2 150 x 150 cycle kit.

### 207 (3) NimaGen Illumina

208 The EasySeq SARS-CoV-2 WGS Library Prep Kit (NimaGen, Nijmegen, Netherlands) protocol has been  
209 implemented for large-scale sequencing of wastewater in the UK (Jeffries 2021). We used version 2  
210 in this study.

211 Twenty microlitres of extracted RNA was cleaned up using 1.8 X Mag-Bind Total Pure NGS Cleanup  
212 beads and eluted in 9 µL of ultrapure water. Reverse transcription was then performed on 8 µL of  
213 eluted RNA using Lunascript (New England Biolabs, Ipswich, MA, USA) at 25°C for 2 minutes, 55°C for  
214 45 minutes and 95°C for 1 minute, followed by a 4°C holding temperature. cDNA (2.5 µL) and 13.5 µL  
215 mastermix (New England Biolabs; i.e., mixture of reagents at concentrations optimal for PCR  
216 preparation) were then added to each of the two PCR plates from the Nimagen SARS-CoV-2 kit and  
217 plated on a PCR thermal cycler for the recommended cycling conditions. The following day, 3.5 µL of

218 each reaction in a plate was pooled together into a 1.5-ml tube corresponding to each plate and a  
219 matching volume of T0.1E (10 mM Tris-HCl pH 8.0, 0.1 mM EDTA) was added. Nimagen's Ampliclean  
220 beads at 0.85x were then added, mixed and left to sit at room temperature for 5 minutes. After two  
221 ethanol washes, the library was eluted in 100 µL of T0.1E. An additional 0.85x Ampliclean bead  
222 cleanup was performed and the purified library eluted in 25 µL of T0.1E. Final DNA concentrations  
223 were then determined by Qubit fluorometry and the readings entered into a molarity calculator  
224 provided by Nimagen. Pooled libraries containing Unique Dual Indexes (UDIs) were then loaded on  
225 the NovaSeq SP 300 flow cell in a 2 x 150-bp read format, spiked with 5% PhiX.

#### 226 (4) Swift Illumina

227 Wastewater and synthetic samples were reverse transcribed using LunaScript with a 20-minute  
228 incubation time. Libraries were generated using the Swift Normalase Amplicon Panels (SNAP) SARS-  
229 CoV-2 Additional Genome Coverage, following the kit protocol. Amplicons were indexed using the  
230 SNAP Unique Dual Indexing Primer Plates. Optimal normalisation using Normalase was omitted due  
231 to low yields. Instead, libraries were run on the Agilent Fragment Analyzer and equimolar pooled.  
232 The final pooled library was quantified using Qubit and qPCR. Sequencing was performed using  
233 Illumina MiSeq v2 150 x 150 cycle kit.

#### 234 (5) SubARTIC *Spike* Sequencing

235 We designed a sequencing protocol for the *Spike gene* region of SARS-CoV-2 by modifying the ARTIC  
236 protocol (above). The protocol used a redesigned primer set (version 3.2, Horsburgh et al. 2021,  
237 Parsons et al. 2021) where the amplicons had a reduced size range of 141–208 bp. The primers were  
238 tiled, with even and odd amplicons amplified separately before pooling for preparing sequencing  
239 libraries.

240 In brief, cDNA was synthesised from each RNA sample and a negative control (molecular grade  
241 water) using Lunascript (New England Biolabs, Ipswich, MA). This method does not require RNA  
242 purification. The primers are split into two tiled pools, even and odd, and PCR amplified in separate  
243 reactions. For each reaction, 4.5 µl cDNA was combined with 6.25 µl Q5 Hotstart High fidelity 2x  
244 Mastermix (New England Biolabs, Ipswich, MA) and 1.75 µl of the primer pool (10 mM). PCR  
245 products were then pooled and a second negative control sample (molecular grade water) included  
246 before sequencing the PCR amplicons on Day 2.

#### 247 (a) Illumina

248 We used the SubARTIC sequencing v 3.2 protocol before loading the libraries onto an Illumina  
249 MiniSeq sequencer in Sheffield, as described in detail by Horsburgh et al. (2021). Up to sixty-six  
250 samples were included in a single sequencing run, including two negative controls. We added 35µlof  
251 PhiX at 1.4 pM to 500 µl of the 1.4 pM library before running on the MiniSeq. Sequencing produced  
252 2x 150-bp paired-end reads.

### 253 *(b) Oxford Nanopore*

254 Much of the sequencing to identify SARS-CoV-2 in clinical samples has been undertaken using Oxford  
255 Nanopore Technology instruments (using the ARTIC protocol; see (1) above). SubARTIC v 3.2  
256 sequencing of the synthetic mixes and wastewater samples was implemented here on the Oxford  
257 Nanopore GridION platform. A detailed protocol is provided by Parsons et al. (2021). Libraries were  
258 prepared using a modified Amplicon by Ligation protocol (SQK-LSK109; Oxford Nanopore  
259 Technologies, Oxford, UK) with Native Barcoding (EXP-NBD104, EXP-NBD114; Oxford Nanopore  
260 Technologies) and run for 18 hours on an R.9.4.1 flow cell using an Oxford Nanopore GridION  
261 sequencer. High accuracy basecalling was used with a minimum barcoding score of 80. All other  
262 parameters were set to their default values.

### 263 ***Bioinformatics***

264 Sequencing data were analysed using a modified version of the nCoV2019-ARTIC pipeline, which was  
265 originally developed for the analysis of clinical samples of SARS-CoV-2 ([https://artic.network/ncov-](https://artic.network/ncov-2019/ncov2019-bioinformatics-sop.html)  
266 [2019/ncov2019-bioinformatics-sop.html](https://artic.network/ncov-2019/ncov2019-bioinformatics-sop.html)). Briefly, reads were first mapped to the SARS-CoV-2  
267 reference genome (NCBI Genbank Accession MN908947.3) with BWA V0.7.17 (Li, 2013). iVar  
268 (Grubaugh et al., 2019) was used to remove the primers based on positional information. An  
269 additional primer trimming step, using Cutadapt v1.18 (Martin, 2011), was included for the SubARTIC  
270 dataset. SNPs and Indels were identified using VarScan v2.3 (Koboldt et al., 2012) using a *p*-value  
271 threshold of 0.01. For simplicity, and comparability between Illumina and Oxford Nanopore  
272 instruments, given that the detection of indels is less reliable using the latter, we excluded indels in  
273 the analysis of the synthetic variant data.

### 274 ***Statistical Analysis***

275 In wastewater samples containing SARS-CoV-2 RNA, variants are often at very low concentration and  
276 will vary in proportion from 0–100%. In such RNA mixtures where one variant is present at a low  
277 proportion, detection of the associated diagnostic SNPs can be stochastic. We therefore developed a  
278 probabilistic model to quantify these errors and relate the data from all the SNPs associated with a

279 variant to the frequency of that variant, and used Bayesian statistical methods to estimate its  
280 parameters based on the data from the synthetic RNA mixtures.

281 The model expresses the mean observed proportions of reads containing SNP-defining variants as a  
282 function of the true proportions of variants; this function has a cubic form, based on empirical  
283 observations of the synthetic data, with two parameters capturing the error level at low  
284 concentrations and the curvature of the function. Because errors can occur at various stages in the  
285 processing of the samples, there is dependence between reads, which means that the variability in  
286 counts greatly exceeds the binomial variation that would follow from independent reads. A standard  
287 approach would be to accommodate this dependence by allowing variation in the mean between  
288 SNPs, typically using a beta-binomial distribution. For the present data, a beta-binomial distribution  
289 did not allow sufficiently heavy-tailed distributions for the observed counts; instead, for each SNP  
290 we used a two-component mixture of beta-binomial distributions, each with the mean determined  
291 by the 'cubic' function. This entails a further three parameters, defining the variances of each  
292 component and their relative weighting. Reads for different SNPs are taken to be independent, given  
293 the parameters. Further details are given in the supplementary material (SI Appendix 1).

294 To estimate the parameters of the model for each sequencing method, we used a Bayesian  
295 statistical approach to fit the model to the synthetic samples containing known proportions of the  
296 two variants. The model-fitting used a Markov chain Monte Carlo algorithm as implemented in the  
297 JAGS package (Plummer, 2017, 2021a), run via the R package *rjags* (Plummer, 2021b). Uninformative  
298 prior distributions were used for the model parameters, separately for each method. Again, further  
299 details are given in the supplementary material (SI Appendix 1). The joint posterior distribution for  
300 the parameters in each case is complex and highly dependent, and so was represented for further  
301 analysis by a large Monte Carlo sample produced from JAGS, rather than attempting to summarise it  
302 parametrically.

303 To apply the model to data with unknown proportions, a prior distribution had to be provided for  
304 the true proportions. All samples were analysed as potentially including two variants but, to allow  
305 for the possibility that only one was present, the prior distribution used had three components: two  
306 discrete components, representing the two possible "pure" cases, plus a continuous component  
307 representing the possibility of an actual mixture, using an uninformative Beta distribution. Fitting the  
308 model with this non-standard prior distribution for proportions used a combination of custom-  
309 written code in R and JAGS, and produced a posterior distribution in the same form. The credible  
310 intervals used to summarise the posterior distributions combine these discrete and continuous  
311 components, as do the Root Mean Squared Errors calculated when the true proportions are known.

312

313 **Results**

314 ***Comparison of variant frequency estimation using each sequencing method in synthetic mixes***

315 We tested each sequencing protocol in both the same synthetic mixes at high and low  
316 concentrations and in the same set of wastewater samples. Coverage plots can be found in  
317 Supplementary Materials Figures 1 and 2 for 1 in 10 and concentrated solutions, respectively.

318 We sequenced each synthetic RNA mixture in duplicate and compared the frequency estimate of  
319 each SNP between replicates (Supplementary Materials Figure 3a and 3b). In general, the frequency  
320 estimates were highly consistent between replicate runs within a sequencing method (Figure 1 and  
321 Figure 4).

322 Spurious (non-variant) SNPs were detected consistently between replicates at usually low frequency  
323 (<10%) in each experiment. Such SNPs are unlikely to affect variant frequency estimates, given that  
324 the proportion of affected SNPs is very small and each variant is characterised by multiple SNPs (6  
325 SNPs in the spike region and 13 SNPs for whole genome were used here, Table 3). By contrast, such  
326 SNPs detected using Illumina and ONT tended not to be consistent with each other (Supplementary  
327 Figure 3), illustrating that, while spurious SNPs were nonrandom within a method, they tended to  
328 differ between methods.

329

330

331

332

333

334

335

336

337

338

339 **Table 3:** Nucleotide changes used in identification of variants. SubARTIC protocols used the spike only  
340 region, whereas Illumina protocols were whole genome.

341

| <b>Spike protein only nucleotide</b> | <b>Whole genome nucleotide</b> |
|--------------------------------------|--------------------------------|
| A23063T                              | A23063T                        |
| C23271A                              | C23271A                        |
| C23604A                              | C23604A                        |
| C23709T                              | C23709T                        |
| C23731T                              | C23731T                        |
| T24506G                              | T24506G                        |
|                                      | C3267T                         |
|                                      | C5388A                         |
|                                      | T6954C                         |
|                                      | C27972T                        |
|                                      | G28048T                        |
|                                      | A28111G                        |
|                                      | GAT28280CTA                    |

342 **Estimation of variant frequencies**

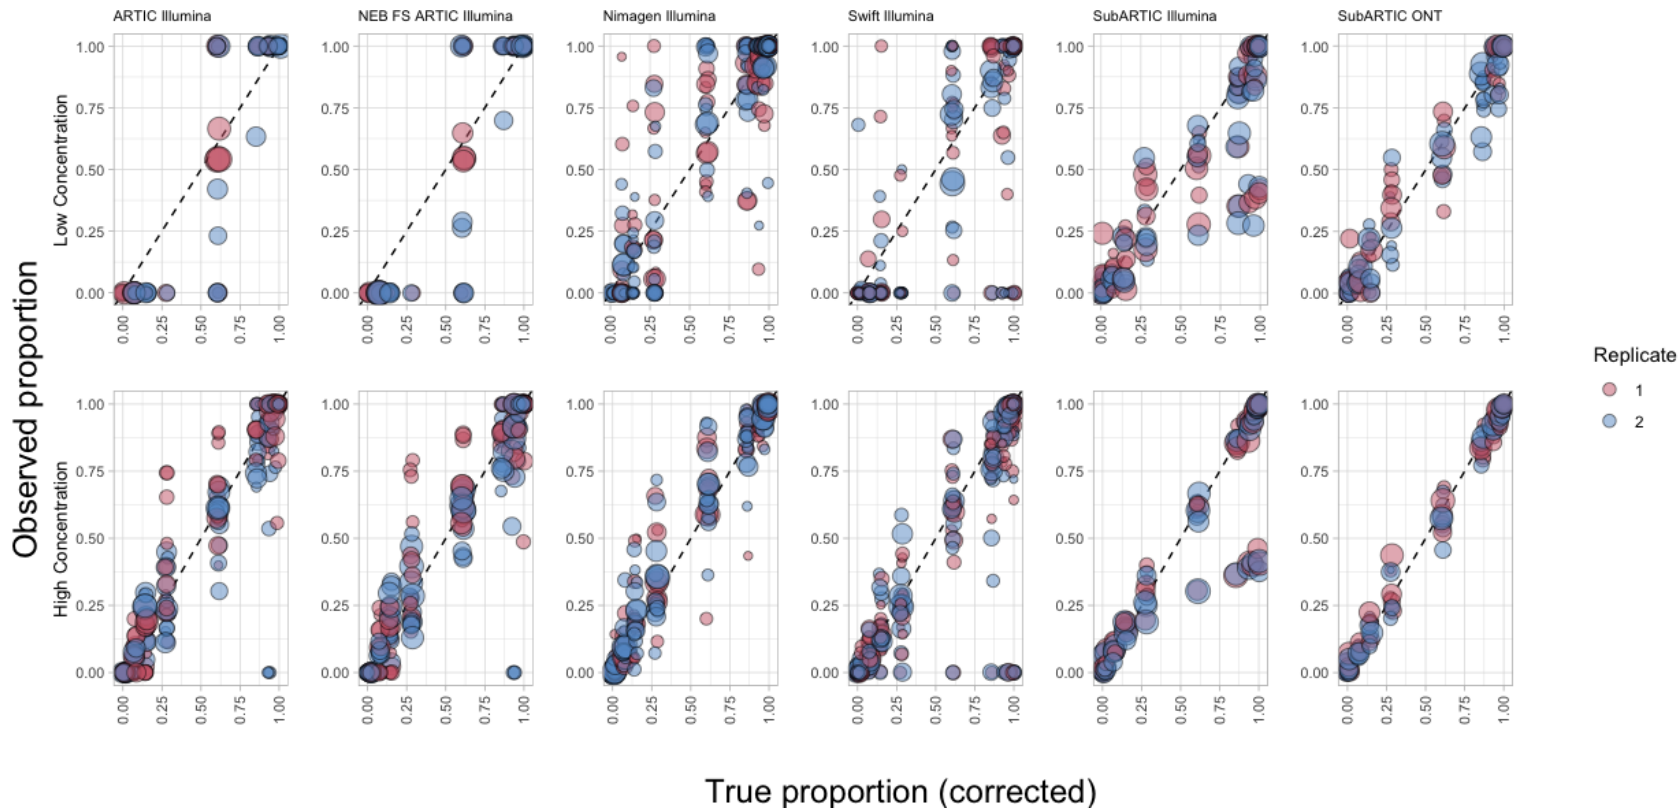

344 **Figure 1:** Estimated frequency of each SNP diagnostic of the SHEF variant relative to its expected actual proportion (the 11 corrected frequencies in Table 1)  
 345 at two concentrations for each of a range of alternative sequencing methods. Two replicates were performed for each method and concentration. Points are  
 346 weighted by size based on the total number of reads. Points are more opaque where they overlie each other. Sequence reads were not always obtained for  
 347 every SNP at every frequency.

348 The frequencies of each SNP diagnostic for each synthetic RNA variant are shown for each mixture  
349 and method at both concentrations (Figure 1). The noise in the estimates clearly increases at lower  
350 concentration in each case, with appreciable dropout of amplification and sequencing for several  
351 sequencing protocols at low concentrations, especially at low frequencies.

352 The SubARTIC ONT method appears to show the tightest apparent correlation with expectation at  
353 high concentration, but is based on fewer SNPs than the whole-genome assays (Figure 1). We  
354 therefore used statistical modelling to formally compare overall variant frequency estimations  
355 across the sequencing datasets (Figure 2).

356

357

358



**A)**

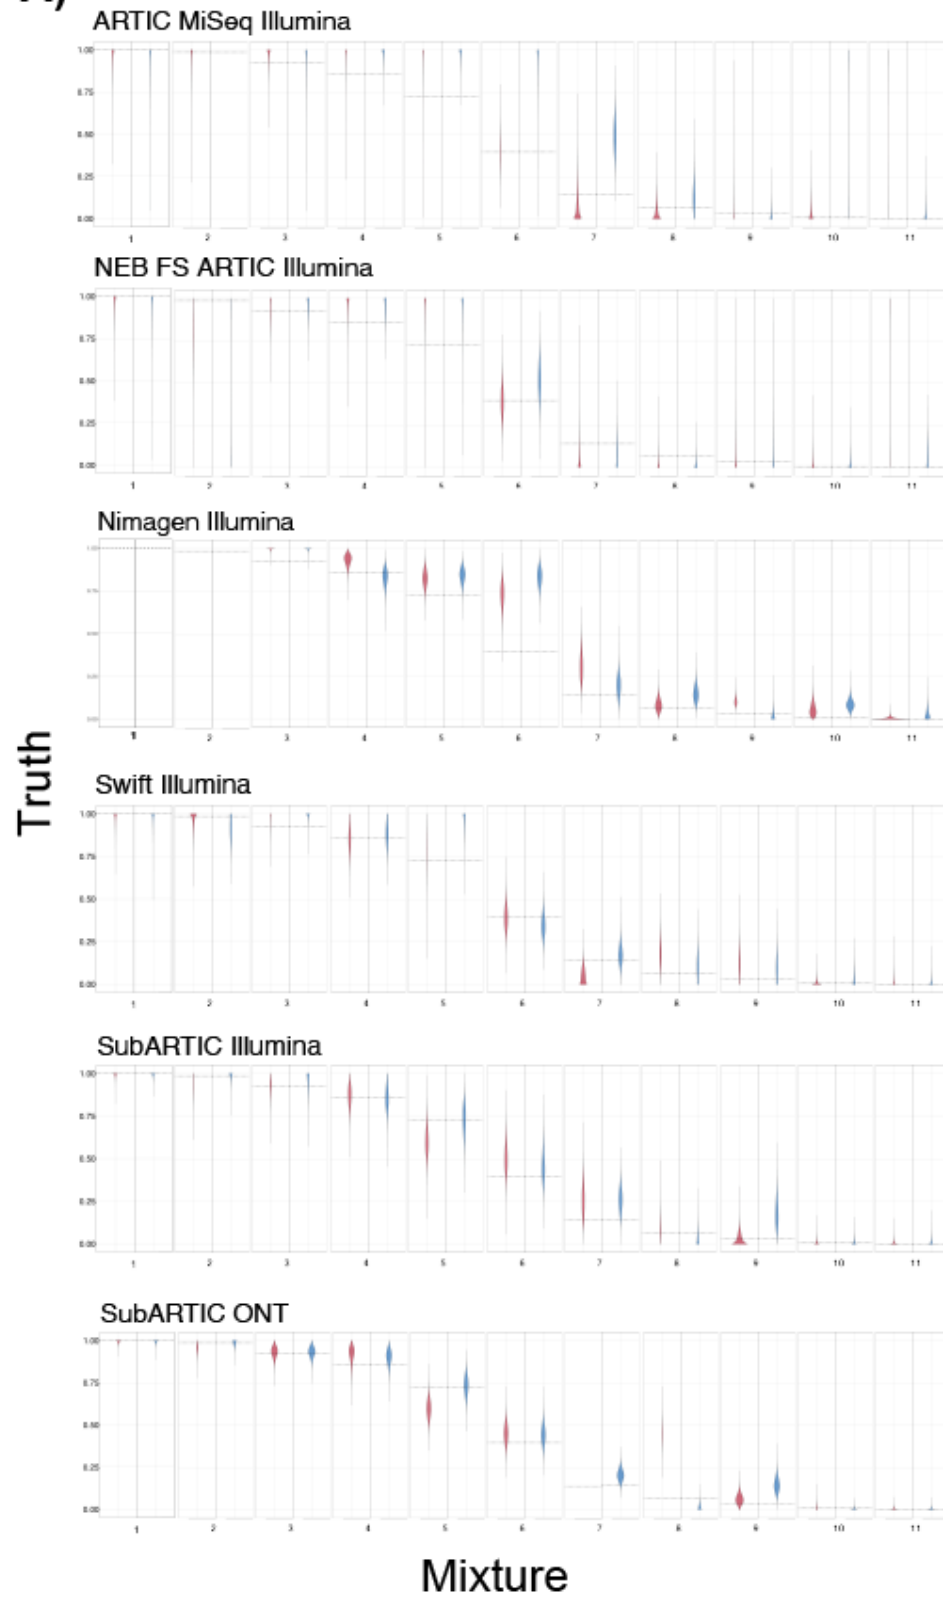

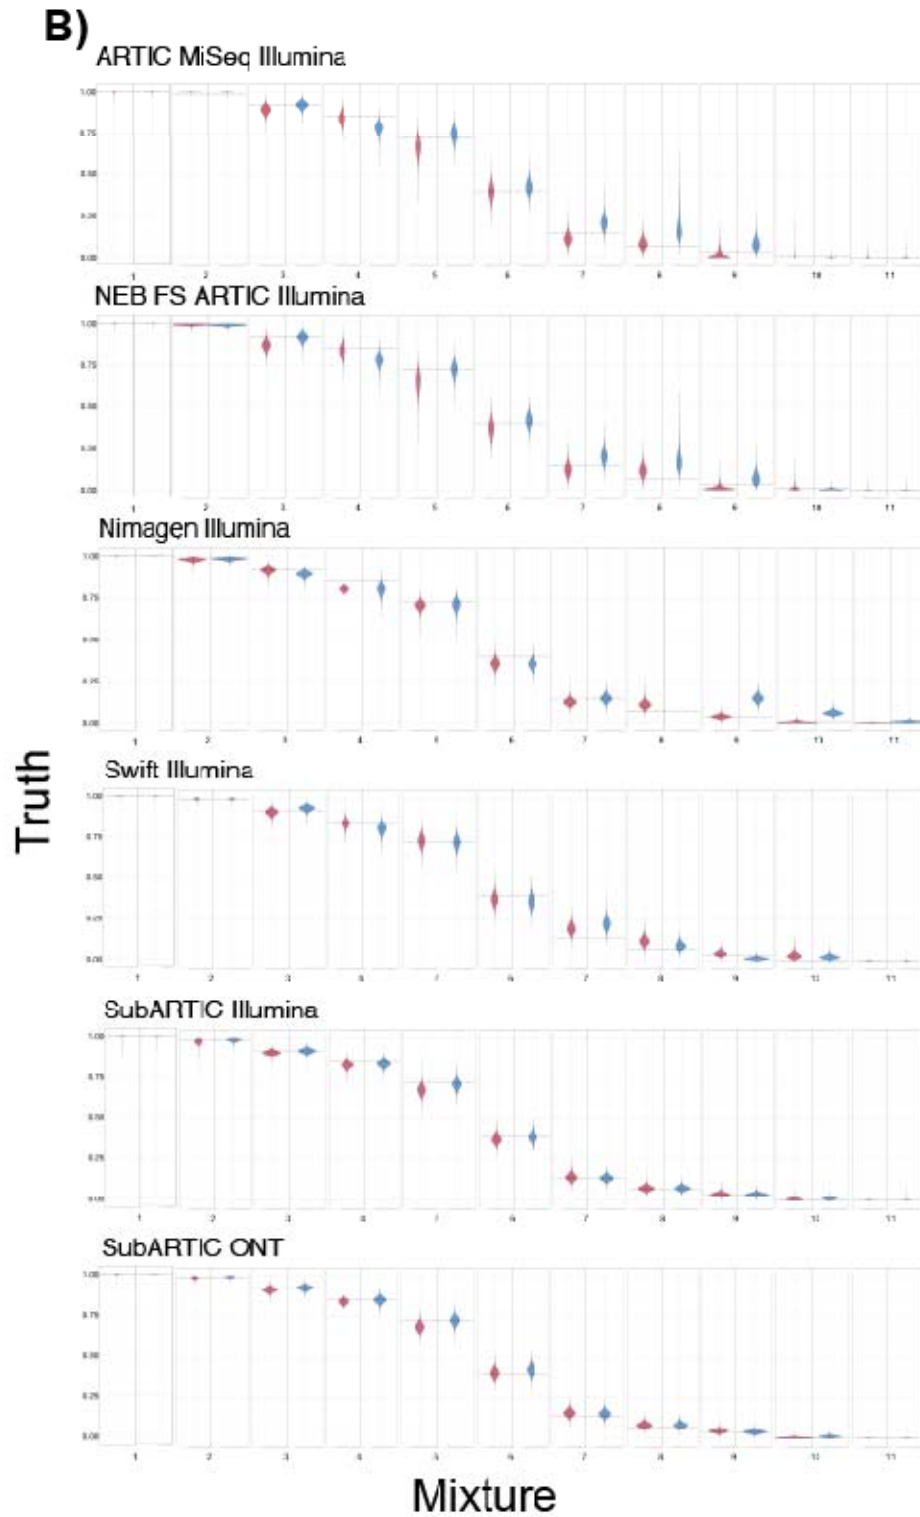

361

362 **Figure 2:** Estimation of variant frequency (truth) shown relative to expectation in (a) 1/10 dilution  
363 and (b) concentrated synthetic mixes, using alternative sequencing methods. For each method we  
364 show the overall estimate and 95% credible intervals. The known proportion of variant frequency at  
365 each mixture is indicated by a dashed horizontal line.

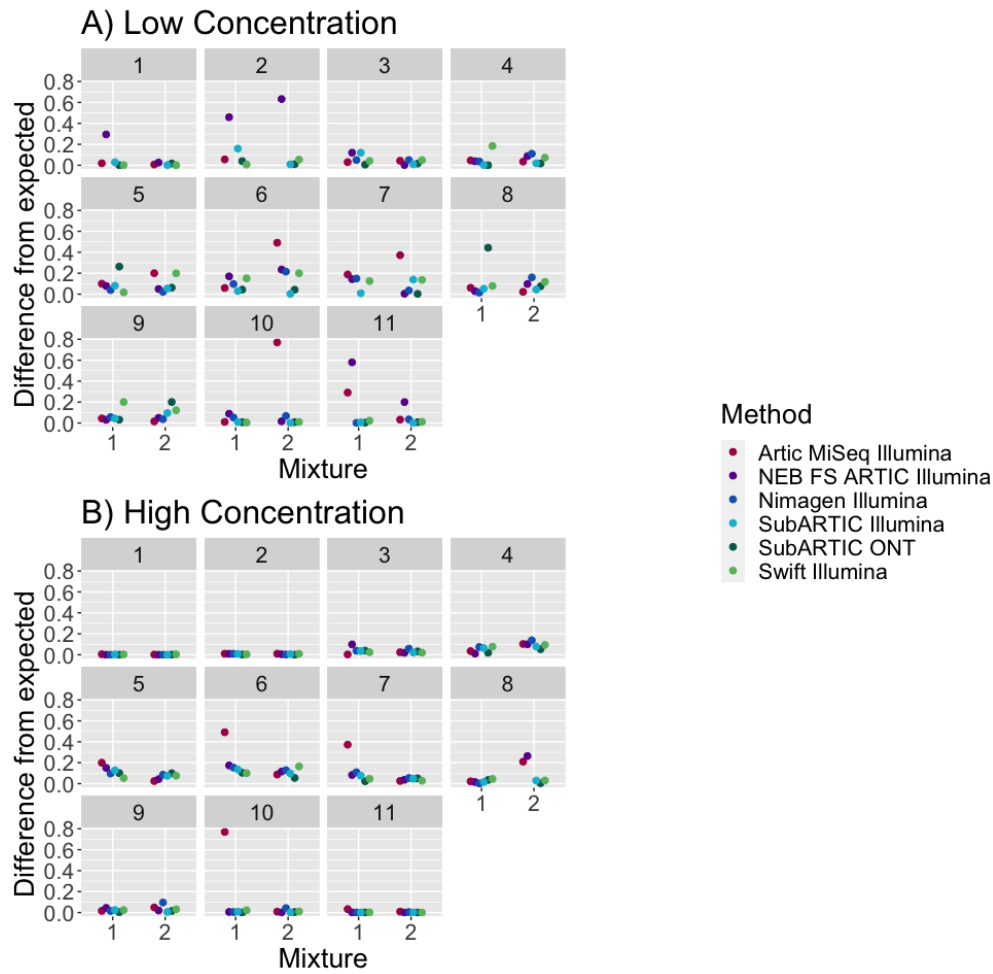

366

367 **Figure 3:** The absolute difference between the predicted and expected variant frequency for the  
368 synthetic mixture when either (a) in a 1/10 dilution or (b) concentrated. The predicted variant  
369 frequency was calculated as the posterior mode. Missing points are the result of models failing to run  
370 due to low read counts.

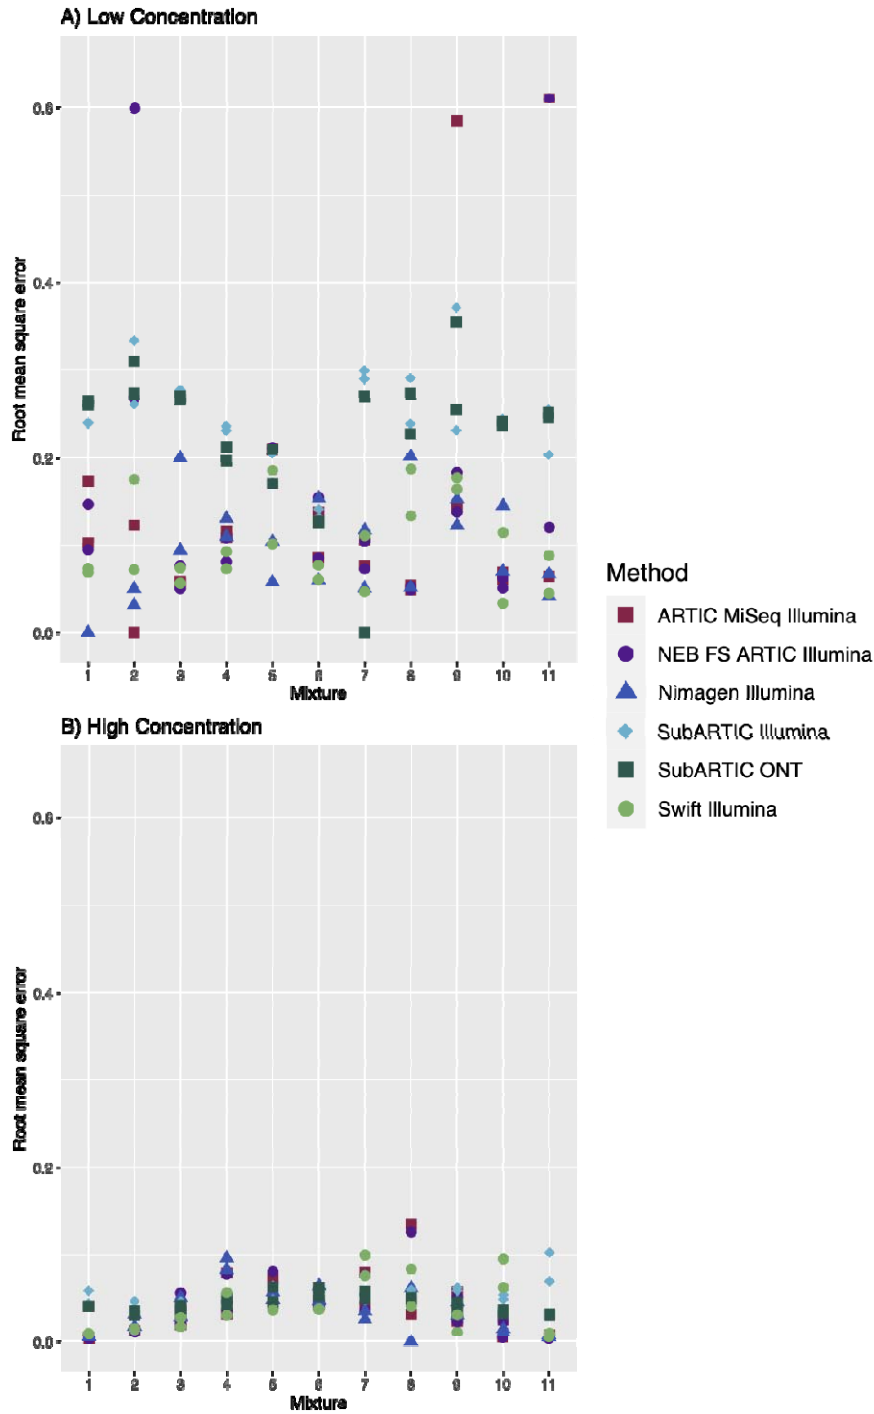

371

372 **Figure 4:** The root mean square error for each method for the synthetic mixture when either (a) in a  
373 1/10 dilution or (b) concentrated. Duplicate points represent the two replicates. A table of raw values  
374 can be found in the Supplementary Materials Table 3 and 4.

375

376

377 **Table 4:** Method performance values calculated as the (i) average (mean) absolute difference  
378 between estimated variant frequency (truth) and known concentration of variants (difference from  
379 expected) and (ii) average (mean) root mean square error across all mixtures and replicates for each  
380 method.

381

| Method                | Concentration | Difference from expected | Root mean square error |
|-----------------------|---------------|--------------------------|------------------------|
| ARTIC Illumina        | Low           | 0.138                    | 0.145                  |
| ARTIC Illumina        | High          | 0.114                    | 0.378                  |
| NEB FS ARTIC Illumina | Low           | 0.156                    | 0.161                  |
| NEB FS ARTIC Illumina | High          | 0.055                    | <b>0.038</b>           |
| Nimagen Illumina      | Low           | 0.068                    | 0.092                  |
| Nimagen Illumina      | High          | 0.053                    | <b>0.036</b>           |
| Swift Illumina        | Low           | 0.082                    | 0.101                  |
| Swift Illumina        | High          | 0.040                    | <b>0.039</b>           |
| SubARTIC Illumina     | Low           | 0.042                    | 0.246                  |
| SubARTIC Illumina     | High          | 0.039                    | 0.056                  |
| SubARTIC ONT          | Low           | 0.062                    | 0.229                  |
| SubARTIC ONT          | High          | 0.030                    | <b>0.044</b>           |

382

383

384 As expected, the high concentration mixtures performed better than the low concentration mixtures  
385 in terms of both how well variant frequency was predicted (Figure 2 and 3, and Table 4) and the  
386 amount of variance in the posterior distribution of predicted variant frequency (Figure 2 and 4, and  
387 Table 4).

388

389 SubARTIC ONT indeed performed best (determined by performance in average difference from  
390 expected and RMSE) in high concentration mixtures (Table 4) and Nimagen Illumina performed best  
391 in low concentration mixtures (Table 4). At high concentrations, SubARTIC ONT, Nimagen Illumina,

392 Swift Illumina and SubARTIC Illumina performed comparably well (Table 4). ARTIC Illumina  
393 performed less well at high concentrations. At low concentrations, Nimagen Illumina was the best at  
394 predicting variant frequencies and had the lowest root mean square error (Table 4). SubARTIC  
395 Illumina, Swift Illumina, SubARTIC ONT, ARTIC MiSeq Illumina and NEB FS ARTIC Illumina were able  
396 to give reasonable estimates of variant frequencies but had large variance in the prior distribution.

397

### 398 ***Wastewater sampling***

399

400 All methods were comparable in predicting variant frequency in wastewater samples (Figure 5). All  
401 methods show the samples were dominated by the main variant (Alpha) in circulation at the time in  
402 line with clinical data.

403

404

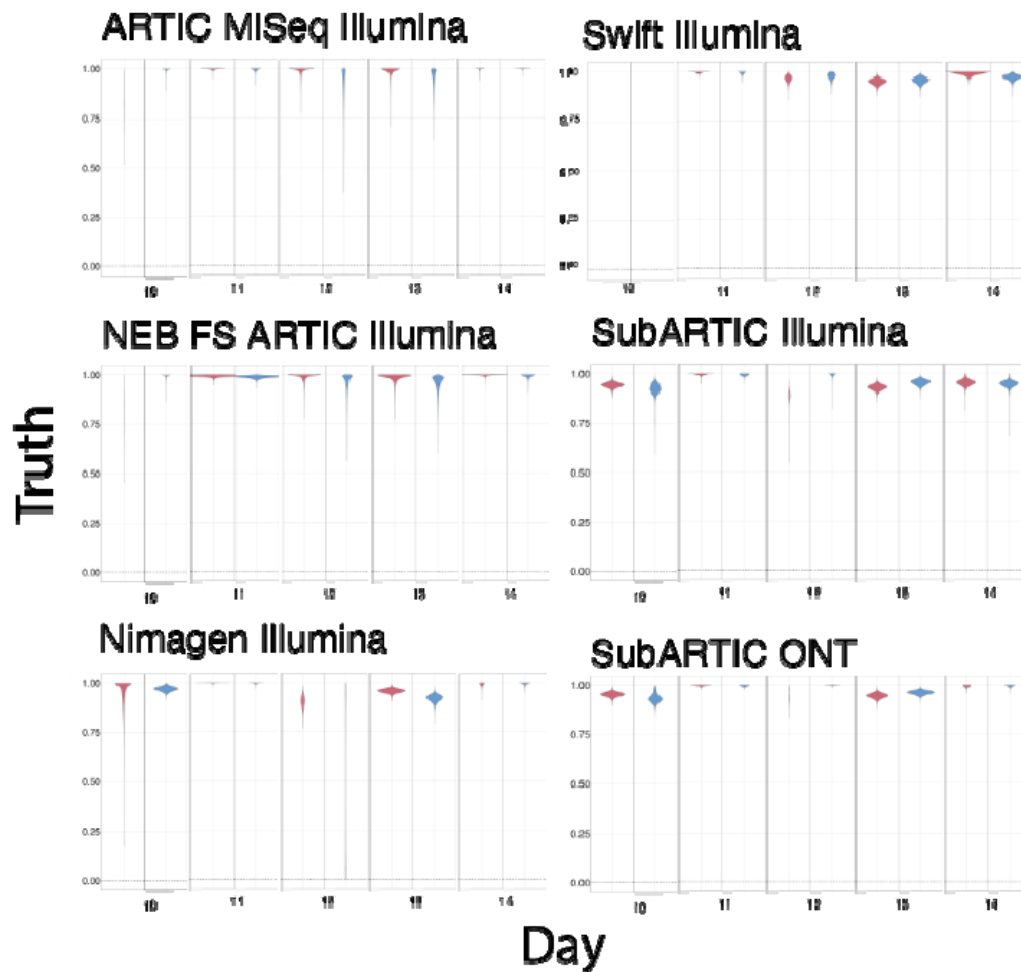

405

406 **Figure 5:** Estimation of variant frequency (truth) in wastewater samples over 5 days in London, UK, in  
407 January 2021 using alternative sequencing methods. For each method we show the overall estimate  
408 and 95% credible intervals. The different colours represent the two replicates used in this analysis.

409

410

#### 411 Discussion

412 Our study has shown that different sequencing methods can detect variant frequency. Though some  
413 methods performed better than others, when at high concentrations all methods showed a similar  
414 degree of accuracy in determining variant levels. This is especially true when mixtures were  
415 dominated by one variant, as indicated in mixtures 1, 2, 10 and 11 (see Figure 3). For these mixtures,  
416 there is also less variability around predicting variant frequencies (Fig. 4). ARTIC Illumina, however,



417 had the greatest difference between observed and expected variant frequencies. The lower  
418 performance of ARTIC is perhaps unsurprising given the longer insert length: as RNA degrades  
419 quickly, the longer insert lengths needed for sequencing mean fewer RNA fragments can be  
420 sequenced. However, in the wastewater samples, all the methods were consistent in showing that  
421 the frequency of alpha was in the range 90–100%, including ARTIC. However, there is a suggestion  
422 that the methods that were more accurate for synthetic mixes are again more precise: all except the  
423 ARTIC methods, for example, predict that alpha was actually at 90% on 13th January.

424 At high concentrations, all other methods (other than ARTIC) performed comparatively similarly,  
425 meaning that the methods could be used interchangeably and would not lead to significant  
426 differences in estimated variant predictions. ARTIC and NEB FS ARTIC performed less well than the  
427 other methods. The SubARTIC protocols had the largest error at low concentrations. As SubARTIC  
428 uses sequencing of the *Spike* region only, the greater coverage (and therefore the additional SNP  
429 targets of interest) gained from whole-genome sequencing likely enables better identification of  
430 variants when SARS-CoV-2 is at low concentration in a sample. The performance of the two  
431 sequencing platforms with the SubARTIC method was comparable at both concentrations. This is  
432 somewhat surprising, given that the sequencing error rate in ONT technologies is generally higher  
433 than that of Illumina (Delahaye and Nicholas 2021).

434 It is notable that the most successful methods were those that used short amplicons (~100–300 bp),  
435 despite the input synthetic RNA targets being *ca* 6,000 bp. We did not test the size of the cDNA  
436 produced from these templates but it seems likely that it was similarly large, and far larger than the  
437 amplicons used by any of the methods. The results may therefore indicate that, under the conditions  
438 of this trial, with many multiplexed targets at low concentration using short amplicons, small  
439 amplicons provide a significant benefit simply due to the higher efficiency of amplifying short  
440 sequences by PCR.

441 Finally, the comparison among methods described here used mixtures of synthetic RNA. These RNAs  
442 were pure, without the multiple potential contaminants (such as surfactants) that are difficult to  
443 remove from RNA extracted from wastewater. Sequencing methods might vary in their sensitivity to  
444 such contamination. We attempted to test this by using all the methods to sequence the same set of  
445 RNAs extracted from wastewater. All methods were successful at identifying the dominant variant,  
446 alpha, but as this was always at very high frequency (>90%), this was not a sensitive test of their  
447 respective sensitivity and accuracy for wastewater samples. Such an analysis would require the use  
448 of wastewater containing more intermediate frequencies of two or more variants, ideally where the  
449 concentration of each was known. This test is currently in progress.

450 Two of the methods identified and assessed in this study to be successful were subsequently  
451 adopted for intensive national wastewater screening programmes: Nimagen for England and Wales,  
452 and SubARTIC for Scotland. In conclusion, this study revealed that new-generation sequencing  
453 methods, including those that focus only on the *Spike* region and on both Illumina and Oxford  
454 Nanopore platforms, can predict variant frequencies in mixed samples of SARS-CoV-2 with a high  
455 degree of accuracy.

456

457

#### 458 **Acknowledgements**

459 We thank the Natural Environment Research Council (NERC) for supporting this project (N-WESP,  
460 NE/V010441/1 grant to TB) and the NERC Environmental Omics Facility (NEOF).

461

#### 462 **Declaration of competing interest**

463 The authors declare no known competing interests.

#### 464 **CRedit authorship contribution statement**

##### 465 **University of Sheffield**

466 **Paul Blackwell:** Conceptualization, Formal analysis, Investigation, Methodology, Supervision, Writing  
467 & editing. **Terry Burke:** Conceptualization, Formal analysis, Funding acquisition, Methodology,  
468 Supervision, Writing & editing. **Helen Hipperson:** Methodology, Investigation, Formal analysis.  
469 **Gavin Horsburgh:** Methodology, Investigation. **Kathryn Maher:** Conceptualization, Formal analysis,  
470 Investigation, Methodology. **Paul Parsons:** Conceptualization, Investigation, Methodology, Writing &  
471 editing. **Lucy Winder:** Formal analysis, Writing & editing.

##### 472 **University of Liverpool**

473 **Claudia Wierzbicki:** Methodology, Investigation, Writing & editing. **Steve Paterson:**  
474 Conceptualization, Supervision, Funding acquisition, Writing & editing.

##### 475 **University of Exeter:**

476 **Aaron Jeffreys:** Methodology, Investigation...

477 **UKHSA**

478 **Mathew Brown:** Conceptualization, Methodology, Supervision, Writing & editing. **Irene Bassano:**  
479 Formal analysis. **Hubert Denise:** Formal analysis, Writing & editing. **Mohammad Khalifa:** Formal  
480 analysis. **Aine Fairbrother-Browne:** Formal analysis.

481 **University of Bangor:**

482 **Kata Farcas:** Conceptualization, Methodology, Supervision... **Rachel Williams:**  
483 Investigation....

484

485 **Reference**

486 Addetia A, Lin MJ, Peddu V, Roychoudhury P, Jerome KR, Greninger AL. 2020. Sensitive recovery of  
487 complete SARS-CoV-2 genomes from clinical samples by use of Swift Biosciences' SARS-CoV-2  
488 multiplex amplicon sequencing panel. *J Clin Microbiol.* 59:e02226-20. doi: 10.1128/JCM.02226-20.

489 Alcoba-Florez, J., Gil-Campesino, H., de Artola, D. G. M., González-Montelongo, R., Valenzuela-  
490 Fernández, A., Ciuffreda, L., & Flores, C. (2020). Sensitivity of different RT-qPCR solutions for SARS-  
491 CoV-2 detection. *International Journal of Infectious Diseases*, 99, 190-192.

492 Bal A, Destras G, Gaymard A, Stefic K, Marlet J, Eymieux S, Regue H, Semanas Q, d'Aubarede C,  
493 Billaud G, et al. 2021. Two-step strategy for the identification of SARS-CoV-2 variant of concern  
494 202012/01 and other variants with Spike deletion H69–V70, France, August to December 2020.  
495 *Eurosurveillance* 26: 2100008.

496 Bahreini F, Najafi R, Amini R, Khazaei S, Bashirian S. 2020. Reducing False Negative PCR Test for  
497 COVID-19. *Int J Matern Child Health AIDS* 9: 408–410.

498 Berglund EC, Kiialainen A, Syvänen AC. 2011. Next-generation sequencing technologies and  
499 applications for human genetic history and forensics. *Investig Genet* 2: 23.

500 Bivins A, Greaves J, Fischer R, Yinda KC, Ahmed W, Kitajima M, Munster VJ, Bibby K. 2020.  
501 Persistence of SARS-CoV-2 in Water and Wastewater. *Environ Sci Technol Lett* 7: 937–942.

502 Burrell AS, Disotell TR, Bergey CM. 2015. The use of museum specimens with high-throughput DNA  
503 sequencers. *J Hum Evol* 79: 35–44.

504 Chen Y, Chen L, Deng Q, Zhang G, Wu K, Ni L, Yang Y, Liu B, Wang W, Wei C, et al. 2020. The presence  
505 of SARS-CoV-2 RNA in the feces of COVID-19 patients. *J Med Virol* 92: 833–840.

- 506 Delahaye C, Nicolas J (2021) Sequencing DNA with nanopores: Troubles and biases. PLOS ONE  
507 16(10): e0257521. doi.org/10.1371/journal.pone.0257521
- 508 Farkas, K. et al. (2020) Wastewater and public health: the potential of wastewater surveillance for  
509 monitoring COVID-19. Current Opinion in Environmental Science & Health, 17, 14–20.
- 510 Forootan A, Sjöback R, Björkman J, Sjögreen B, Linz L, Kubista M. 2017. Methods to determine limit  
511 of detection and limit of quantification in quantitative real-time PCR (qPCR). Biomol Detect Quantif  
512 12: 1–6.
- 513 Horsburgh G, Parsons P, Maher K, Paterson S, Burke T (2021) SubARTIC Illumina SARS-CoV-2 *Spike*  
514 sequencing protocol (LoCost) v3.2. protocols.io doi:10.17504/protocols.io.btp nmk
- 515 Hillary, L.S., Farkas, K., Maher, K.H., Lucaci, A., Thorpe, J., Distaso, M.A., Gaze, W.H., Paterson, S.,  
516 Burke, T., Connor, T.R., McDonald, J.E., Malham, S.K., Jones, D.L., 2021. Monitoring SARS-CoV-2 in  
517 municipal wastewater to evaluate the success of lockdown measures for controlling COVID-19 in the  
518 UK. Water Res 117214. doi: 10.1016/j.watres.2021.117214
- 519 Karthikeyan, S., Levy, J.I., De Hoff, P. et al (2022). Wastewater sequencing reveals early cryptic SARS-  
520 CoV-2 variant transmission. Nature 609, 101–108. doi:10.1038/s41586-022-05049-6
- 521 Koboldt, D.C., Zhang, Q., Larson, D.E., Shen, D., McLellan, M.D., Lin, L., Miller, C.A., Mardis, E.R., Ding,  
522 L., Wilson, R.K. (2012) VarScan 2: somatic mutation and copy number alteration discovery in cancer  
523 by exome sequencing. Genome Res 22, 568–576.
- 524 Kudo, E., Israelow, B., Vogels, C. B. F., Lu, P., Wyllie, A. L., Tokuyama, M., Venkataraman, A.,  
525 Brackney, D. E., Ott, I. M., Petrone, M. E., Earnest, R., Lapidus, S., Muenker, M. C., Moore, A. J.,  
526 Casanovas-Massana, A., Omer, S. B., Dela Cruz, C. S., Farhadian, S. F., Ko, A. I., & Grubaugh, N. D.  
527 (2020). Detection of SARS-CoV-2 RNA by multiplex RT-qPCR. PLoS Biology., 18(10).  
528 <https://doi.org/10.1371/journal.pbio.3000867>
- 529 Larsen, D.A. and Wigginton, K.R. (2020) Tracking COVID-19 with wastewater. Nature Biotechnology,  
530 38: 1151–1153.
- 531 Lefever S, Pattyn F, Hellemans J, Vandesompele J. 2013. Single-nucleotide polymorphisms and other  
532 mismatches reduce performance of quantitative PCR assays. Clin Chem 59: 1470–1480.
- 533 Martin, M., 2011. Cutadapt removes adapter sequences from high-throughput sequencing reads.  
534 EMBnet.journal 17, 10. doi: [10.14806/ej.17.1.200](https://doi.org/10.14806/ej.17.1.200)

- 535 Morvan, M., Jacomo, A.L., Souque, C. et al (2022). An analysis of 45 large-scale wastewater sites in  
536 England to estimate SARS-CoV-2 community prevalence. *Nat Commun* 13, 4313. [https://doi-](https://doi-org.sheffield.idm.oclc.org/10.1038/s41467-022-31753-y)  
537 [org.sheffield.idm.oclc.org/10.1038/s41467-022-31753-y](https://doi-org.sheffield.idm.oclc.org/10.1038/s41467-022-31753-y)
- 538 Parsons P J, Horsburgh G, Maher K, Paterson S, Burke T (2021) SubARTIC ONT SARS-CoV-2 *Spike*  
539 sequencing protocol (LoCost) V3.2. [protocols.io](https://www.protocols.io) doi: [10.17504/protocols.io.btvnnn5e](https://doi.org/10.17504/protocols.io.btvnnn5e)
- 540 Peccia J, Zulli A, Brackney DE, Grubaugh ND, Kaplan EH, Casanovas-Massana A, Ko AI, Malik AA,  
541 Wang D, Wang M, Warren JL, Weinberger DM, Arnold W, Omer SB (2020). Measurement of SARS-  
542 CoV-2 RNA in wastewater tracks community infection dynamics. *Nat Biotechnol.* 38(10):1164-1167.
- 543 Plummer, M. (2017) JAGS Version 4.3.0 User Manual [https://sourceforge.net/projects/mcmc-](https://sourceforge.net/projects/mcmc-jags/files/Manuals/4.x/)  
544 [jags/files/Manuals/4.x/](https://sourceforge.net/projects/mcmc-jags/files/Manuals/4.x/)
- 545 Plummer, M (2021a) JAGS. <https://mcmc-jags.sourceforge.io/>
- 546 Plummer, M. (2021b). rjags: Bayesian Graphical Models using MCMC. R package version 4-12.  
547 <https://CRAN.R-project.org/package=rjags>
- 548 Quick, J (2020) nCoV-2019 sequencing protocol v3 (LoCost) V.3. [protocols.io](https://www.protocols.io)  
549 <https://www.protocols.io/view/ncov-2019-sequencing-protocol-v3-locost-bp2l6n26rgqe/v3>
- 550 R Core Team, 2020. R: A Language and Environment for Statistical Computing. R Foundation for  
551 Statistical Computing, Vienna, Austria. <https://www.R-project.org/>
- 552 Rivett, L., Sridhar, S., Sparkes, D., Routledge, M., Jones, N.K., Forrest, S., Young, J., Pereira-Dias, J.,  
553 Hamilton, W.L., Ferris, M. and Torok, M.E. (2020). Screening of healthcare workers for SARS-CoV-2  
554 highlights the role of asymptomatic carriage in COVID-19 transmission. *eLife* 9: e58728.
- 555 Ryu S, Han J, Norden-Krichmar TM, Schork NJ, Suh Y. (2018). Effective discovery of rare variants by  
556 pooled target capture sequencing: A comparative analysis with individually indexed target capture  
557 sequencing. *Mutat Res - Fundam Mol Mech Mutagen* 809: 24–31.
- 558 Sah, P., Fitzpatrick, M.C., Zimmer, C.F., Abdollahi, E., Juden-Kelly, L., Moghadas, S.M., Singer, B.H.  
559 and Galvani, A.P., (2021). Asymptomatic SARS-CoV-2 infection: A systematic review and meta-  
560 analysis. *Proc. Natl Acad. Sci. USA* 118, e2109229118.
- 561 Sala-Comorera L, Reynolds LJ, Martin NA, O’Sullivan JJ, Meijer WG, Fletcher NF. 2021. Decay of  
562 infectious SARS-CoV-2 and surrogates in aquatic environments. *Water Res* 117090.

563 Sanz JL, Köchling T. 2019. Next-generation sequencing and waste/wastewater treatment: a  
564 comprehensive overview. *Rev Environ Sci Biotechnol* 18: 635–680.

565 Schrader C, Schielke A, Ellerbroek L, Johne R. 2012. PCR inhibitors - occurrence, properties and  
566 removal. *J Appl Microbiol* 113: 1014–1026.

567 Tegally, H. et al. (2021) Detection of a SARS-CoV-2 variant of concern in South Africa. *Nature.*, 592,  
568 438–443. doi:10.1038/s41586-021-03402-9.

569 UKHSA (2021) Environmental Monitoring For Health Protection (EMHP); wastewater monitoring of  
570 SARS-CoV-2 in England: June 2021. [https://www.gov.uk/government/publications/monitoring-of-](https://www.gov.uk/government/publications/monitoring-of-sars-cov-2-rna-in-england-wastewater-monthly-statistics-june-2021/environmental-monitoring-for-health-protection-emhp-wastewater-monitoring-of-sars-cov-2-in-england-june-2021#concentration-of-sars-cov-2-rna-in-wastewater-samples-1-june-to-28-june)  
571 [sars-cov-2-rna-in-england-wastewater-monthly-statistics-june-2021/environmental-monitoring-for-](https://www.gov.uk/government/publications/monitoring-of-sars-cov-2-rna-in-england-wastewater-monthly-statistics-june-2021/environmental-monitoring-for-health-protection-emhp-wastewater-monitoring-of-sars-cov-2-in-england-june-2021#concentration-of-sars-cov-2-rna-in-wastewater-samples-1-june-to-28-june)  
572 [health-protection-emhp-wastewater-monitoring-of-sars-cov-2-in-england-june-2021#concentration-](https://www.gov.uk/government/publications/monitoring-of-sars-cov-2-rna-in-england-wastewater-monthly-statistics-june-2021/environmental-monitoring-for-health-protection-emhp-wastewater-monitoring-of-sars-cov-2-in-england-june-2021#concentration-of-sars-cov-2-rna-in-wastewater-samples-1-june-to-28-june)  
573 [of-sars-cov-2-rna-in-wastewater-samples-1-june-to-28-june](https://www.gov.uk/government/publications/monitoring-of-sars-cov-2-rna-in-england-wastewater-monthly-statistics-june-2021/environmental-monitoring-for-health-protection-emhp-wastewater-monitoring-of-sars-cov-2-in-england-june-2021#concentration-of-sars-cov-2-rna-in-wastewater-samples-1-june-to-28-june)

574 Volz E, Mishra S, Chand M, Barrett JC, Johnson R, Geidelberg L, Hinsley WR, Laydon DJ, Dabrera G,  
575 O’Toole Á, et al. 2021. Assessing transmissibility of SARS-CoV-2 lineage B.1.1.7 in England. *Nature*  
576 593: 266–269.

577

578

579

580

581

582

583

584

585

586

587

588

589
